# Supplementary material for: Enhanced mechanical and electrical properties of starch-based hydrogels incorporating polyacrylic acid and MXene for advanced wearable sensors in sign language recognition
Source: Royal Society of Chemistry journal article supplement (doi:10.1039/d3sd00250k), 2023-11-25
Supplement: d3sd00250k1.pdf [file d3sd00250k1.pdf]

# Enhanced Mechanical and Electrical Properties of Starch-Based Hydrogels Incorporating Polyacrylic Acid and MXene for Advanced Wearable Sensors in Sign Language Recognition

Jionghong Liang<sup>1,2</sup>, Ke Ma<sup>1</sup>, Wenshuo Gao<sup>1</sup>, Yue Xin<sup>1\*</sup>, Shousen Chen<sup>1</sup>,  
Weicheng Qiu<sup>1</sup>, Gengzhe Shen<sup>3</sup>, Xin He<sup>1\*</sup>

<sup>1</sup> School of Applied Physics and Materials, Wuyi University, Jiangmen 529020, P.R. China;

<sup>2</sup> School of Electromechanical Engineering, Guangdong University of Technology, Guangzhou 510006, P.R. China;

<sup>3</sup> Zhuhai Institute of Advanced Technology Chinese Academy of Sciences, Zhuhai 519003, P.R. China.

Correspondences: Yue Xin (xin3231946@163.com); Xin He (hexin@wyu.edu.cn)

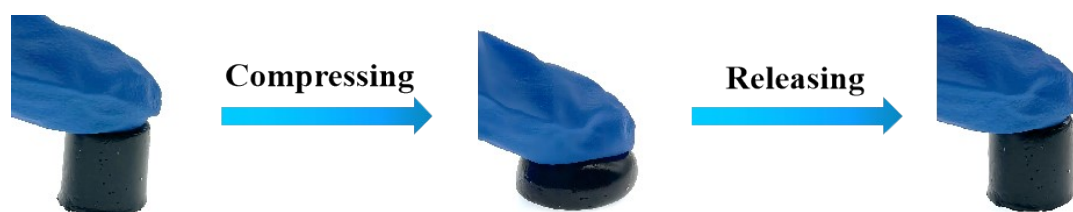

**Figure S1** Deformations of the the PAA/Starch/MXene organohydrogel with compressing and releasing states.

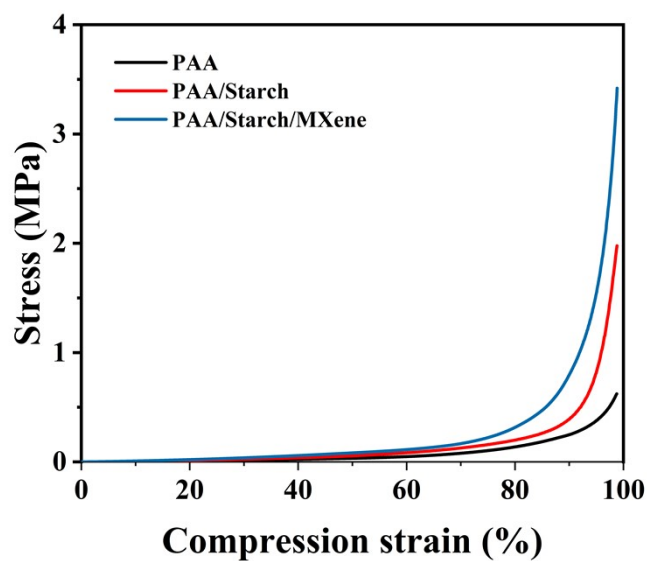

**Figure S2** Compressive stress-strain curves of PAA, PAA/Starch and PAA/Starch/MXene organohydrogels.

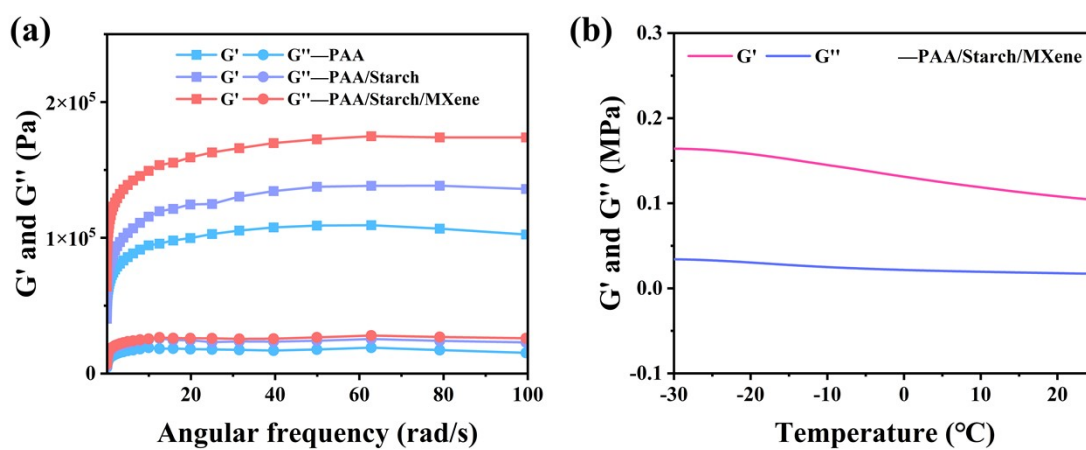

**Figure S3** (a) Frequency scanning curve of PAA, PAA/Starch, and PAA/Starch/MXene organohydrogels; (b) Storage modulus ( $G'$ ) and loss modulus ( $G''$ ) of the PAA/Starch/MXene organohydrogel as a function of temperature.

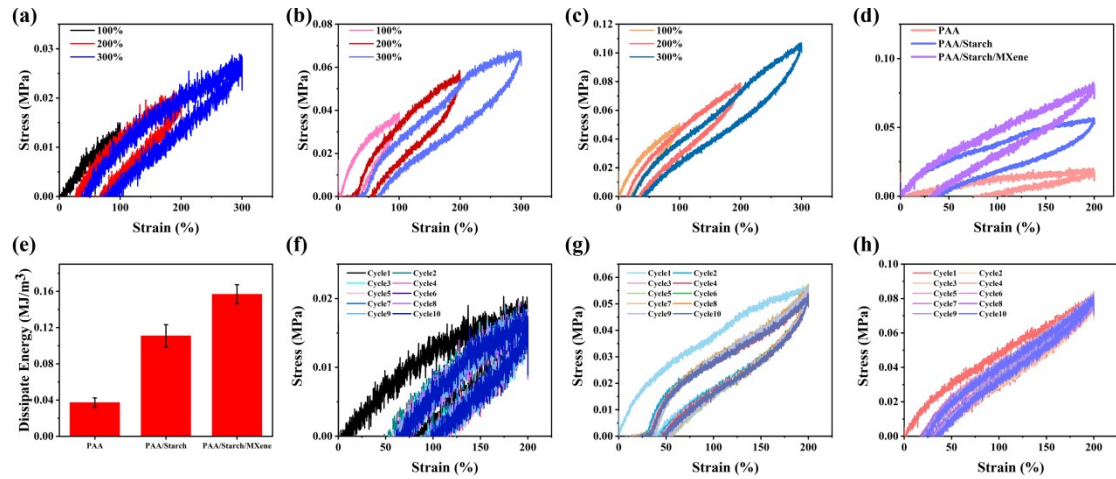

**Figure S4** Loading-unloading curves of (a) PAA (b) PAA/Starch and (c) PAA/Starch/MXene organohydrogel at different strain of 100-300%; (d) Loading-unloading curves of the organohydrogels at the same strain of 200%; (e) Calculated dissipate energy from Figure S3d; Successive cyclic loading-unloading curves at a maximum strain of 200% without intervals for (f) PAA (g) PAA/Starch and (h) PAA/Starch/MXene organohydrogels.

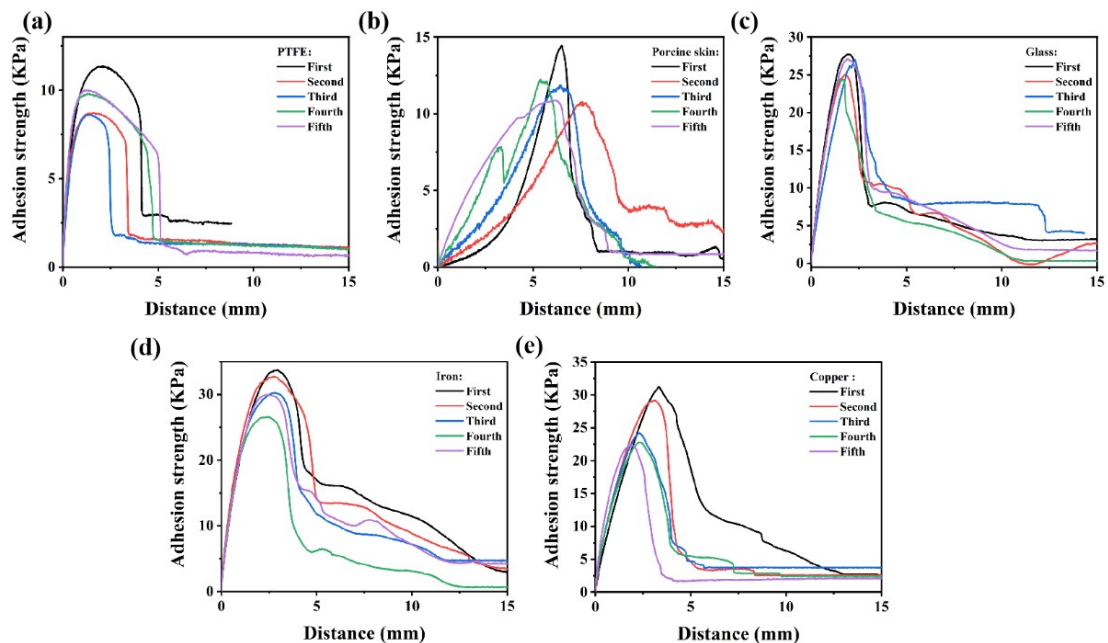

**Figure S5** Repeatable adhesion behaviors of the different substrates tested by cyclic tensile adhesion tests. (a) PTFE. (b) Porcine skin. (c) Glass. (d) Iron. (e) Copper.

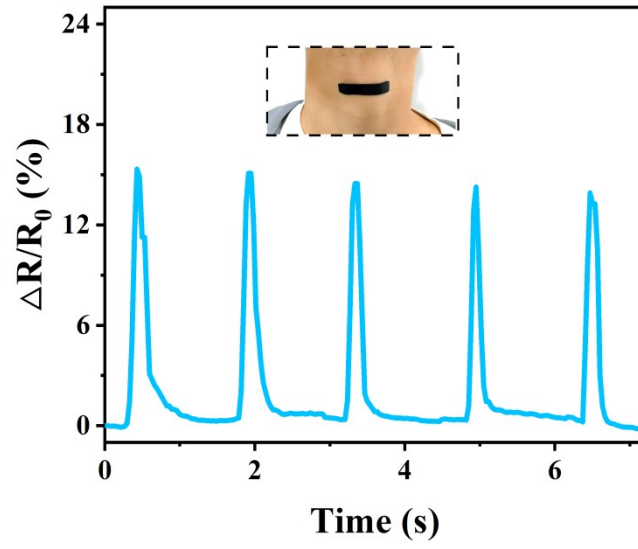

**Figure S6** Real-time relative resistance changes for the detection of throat swallowing.

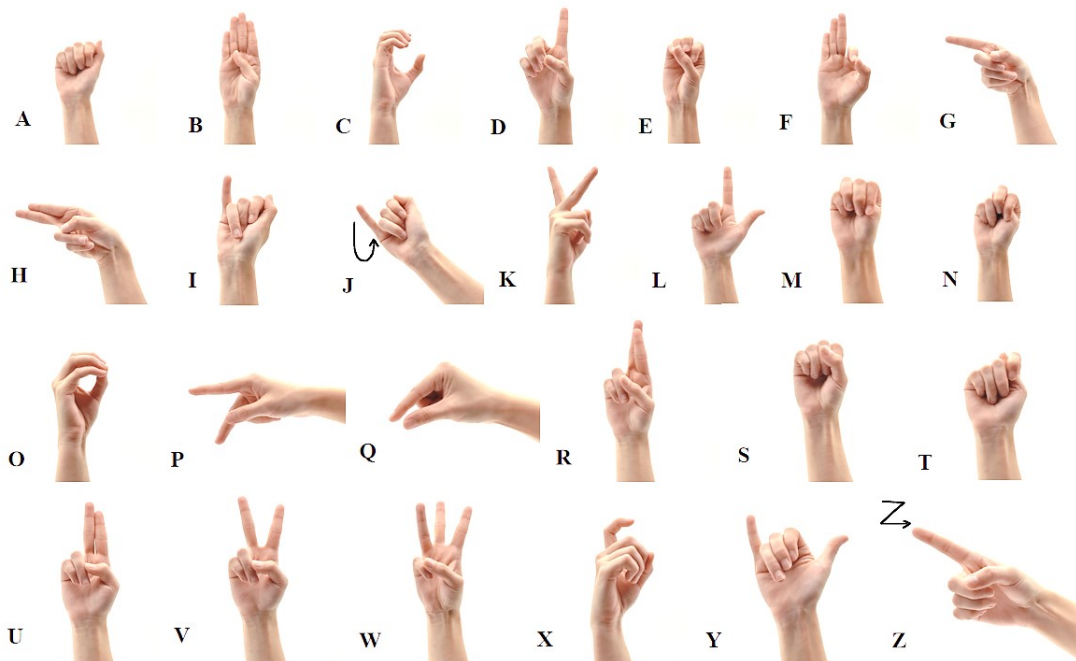

**Figure S7** Gestures corresponding to 26 English letters.

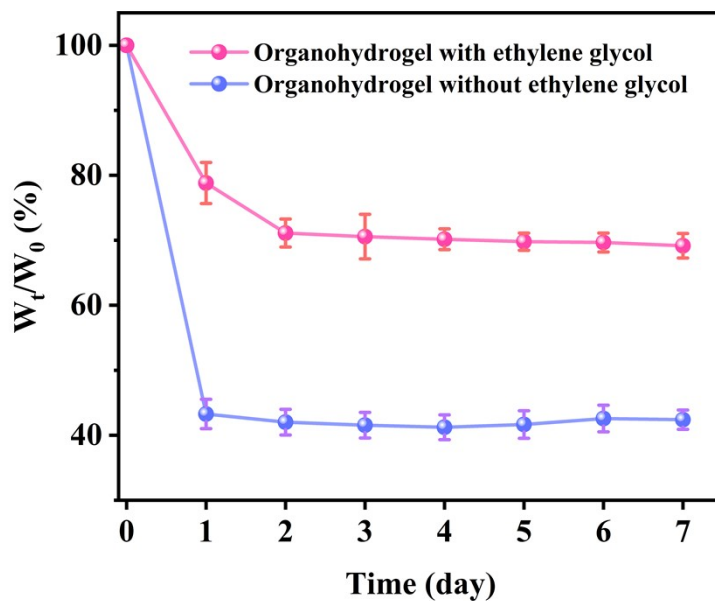

**Figure S8** Weight change curve of organohydrogel with ethylene glycol and without ethylene glycol over time.

**Table S1** Sample compositions of the organohydrogels

| Sample                       | AA /g | Starch /g | MXene /mL | Ethylene Glycol /mL | MBA /mg | H <sub>2</sub> O /mL | APS /mg |
|------------------------------|-------|-----------|-----------|---------------------|---------|----------------------|---------|
| PAA                          | 4     | 0         | 0         | 3                   | 4       | 7                    | 5       |
| PAA/Starch (0:7)             | 4     | 0         | 1.5       | 3                   | 4       | 5.5                  | 5       |
| PAA/Starch (1:7)             | 4     | 0.5714    | 1.5       | 3                   | 4       | 5.5                  | 5       |
| PAA/Starch (2:7)             | 4     | 1.1428    | 1.5       | 3                   | 4       | 5.5                  | 5       |
| PAA/Starch (3:7)             | 4     | 1.7142    | 1.5       | 3                   | 4       | 5.5                  | 5       |
| PAA/Starch/MXene (0 mg/ml)   | 4     | 1.1428    | 0         | 3                   | 4       | 7                    | 5       |
| PAA/Starch/MXene (1.5 mg/ml) | 4     | 1.1428    | 1.5       | 3                   | 4       | 5.5                  | 5       |
| PAA/Starch/MXene (2.5 mg/ml) | 4     | 1.1428    | 2.5       | 3                   | 4       | 4.5                  | 5       |
| PAA/Starch/MXene (3.5 mg/ml) | 4     | 1.1428    | 3.5       | 3                   | 4       | 3.5                  | 5       |
| PAA/Starch/MXene (4.5 mg/ml) | 4     | 1.1428    | 4.5       | 3                   | 4       | 2.5                  | 5       |
| PAA/Starch/MXene (5.5 mg/ml) | 4     | 1.1428    | 5.5       | 3                   | 4       | 1.5                  | 5       |

PS: Concentration of MXene is 10 mg mL<sup>-1</sup>

**Table S2** Comparison of comprehensive performances of the reported starch-based hydrogels

| Hydrogels                                  | Fracture strain (%) | Fracture stress (MPa) | Toughness (MJ m <sup>-3</sup> ) | Workable strain range (%) | Gauge factor | Self-adhesive ability | Anti-fatigue ability | Freezing tolerance (°C) | Ref.      |
|--------------------------------------------|---------------------|-----------------------|---------------------------------|---------------------------|--------------|-----------------------|----------------------|-------------------------|-----------|
| Starch/PVA/AlCl <sub>3</sub> /[Emim]A<br>c | 567                 | 0.52                  | 1.42                            | 400                       | 5.93         | N/A                   | N/A                  | -20                     | [1]       |
| P(Am-DMC)-CMS                              | 411                 | 0.217                 | 0.43                            | 400                       | 5.73         | N/A                   | Yes                  | N/A                     | [2]       |
| St-PVA-GO-IL                               | 657.5               | 0.64                  | 2.08                            | 500                       | 6.04         | N/A                   | Yes                  | -20                     | [3]       |
| STH                                        | 135                 | 0.06                  | N/A                             | 50                        | 0.98         | Yes                   | Yes                  | N/A                     | [4]       |
| Starch/PVA/EG/TA/CaCl <sub>2</sub>         | 606.8               | 1.1                   | 2.56                            | 500                       | 2.51         | N/A                   | N/A                  | -32.2                   | [5]       |
| Starch/PVA/glycerol/CaCl <sub>2</sub>      | 790                 | 0.53                  | 1.99                            | 400                       | 3.42         | N/A                   | N/A                  | -29.8                   | [6]       |
| MMs-DN                                     | 1615                | 0.483                 | N/A                             | 400                       | 3.7          | N/A                   | Yes                  | -40                     | [7]       |
| AA/Starch 98 %                             | 1290                | 0.023                 | N/A                             | 500                       | 5.6          | Yes                   | Yes                  | N/A                     | [8]       |
| SPAЕ                                       | 567                 | 0.53                  | N/A                             | 400                       | 5.93         | N/A                   | N/A                  | -20                     | [9]       |
| PAA/Starch/MXene                           | 1237                | 0.34                  | 2.40                            | 880                       | 14.19        | Yes                   | Yes                  | -30                     | this work |

N/A is donated as 'not available' in the references.



## References

1. Lu, L.; Huang, Z.; Li, X.; Li, X.; Cui, B.; Yuan, C.; Guo, L.; Liu, P.; Dai, Q., A high-conductive, anti-freezing, antibacterial and anti-swelling starch-based physical hydrogel for multifunctional flexible wearable sensors. *Int J Biol Macromol* 2022, 213, 791-803.
2. Gao, Y.; Zhang, Z.; Ren, X.; Jia, F.; Gao, G., A hydrogel sensor driven by sodium carboxymethyl starch with synergistic enhancement of toughness and conductivity. *J Mater Chem B* 2022, 10 (30), 5743-5752.
3. Li, X.; Zhang, S.; Li, X.; Lu, L.; Cui, B.; Yuan, C.; Guo, L.; Yu, B.; Chai, Q., Starch/polyvinyl alcohol with ionic liquid/graphene oxide enabled highly tough, conductive and freezing-resistance hydrogels for multimodal wearable sensors. *Carbohydr Polym* 2023, 320, 121262.
4. Zeng, S.; Zhang, J.; Zu, G.; Huang, J., Transparent, flexible, and multifunctional starch-based double-network hydrogels as high-performance wearable electronics. *Carbohydr Polym* 2021, 267, 118198.
5. He, L.; Ye, D.; Weng, S.; Jiang, X., A high-strength, environmentally stable, self-healable, and recyclable starch/PVA organohydrogel for strain sensor. *Eur Polym J* 2022, 181, 111650.
6. Lu, J.; Gu, J.; Hu, O.; Fu, Y.; Ye, D.; Zhang, X.; Zheng, Y.; Hou, L.; Liu, H.; Jiang, X., Highly tough, freezing-tolerant, healable and thermoplastic starch/poly(vinyl alcohol) organohydrogels for flexible electronic devices. *J Mater Chem A* 2021, 9 (34), 18406-18420.
7. Liu, S.; Wang, X.; Peng, Y.; Wang, Z.; Ran, R., Highly stretchable, strain-sensitive, and antifreezing macromolecular microsphere composite starch-based hydrogel. *Macromol Mater Eng* 2021, 306 (9), 2100198.
8. Zhou, Y.; Fei, X.; Tian, J.; Xu, L.; Li, Y., Biomass-based hydrogels with high ductility, self-adhesion and conductivity inspired by starch paste for strain sensing. *Int J Biol Macromol* 2022, 222 (Pt A), 1211-1220.
9. Lu, L.; Huang, Z.; Li, X.; Li, X.; Cui, B.; Yuan, C.; Guo, L.; Liu, P.;



Dai, Q., A high-conductive, anti-freezing, antibacterial and anti-swelling starch-based physical hydrogel for multifunctional flexible wearable sensors. *Int J Biol Macromol* 2022, 213, 791-803.
